# Supplementary material for: Fecal microbiota transplantation unveils sex-specific differences in a controlled cortical impact injury mouse model
Source: Front Microbiol. 2024 Feb 12;14:1336537. doi: 10.3389/fmicb.2023.1336537 (PMC10894955; doi:10.3389/fmicb.2023.1336537)
Supplement: Supplementary file 4 [file Table_4.XLSX]

## Sheet: Supplementary File 4
Supplementary File 4 : Phylum level abundance and F/B ratio
Phylum	Sham_F	Sham_F	Sham_F	Sham_F	Average	Percentage		CCI_F	CCI_F	CCI_F	CCI_F	Average	Percentage		CCI_M→F	CCI_M→F	CCI_M→F	CCI_M→F	Average	Percentage
Actinobacteria	292	187	615	233	331.75	1.13328		871	321	254	460	476.5	3.2849		422	271	450	503	411.5	0.872626
Bacteroidetes	7209	7389	34326	6851	13943.8	47.6327		6781	5396	4076	4557	5202.5	35.8651		44284	31392	7084	5663	22105.8	46.8774
Deferribacteres	61	8	148	52	67.25	0.22973		63	130	29	42	66	0.454992		3	377	4	7	97.75	0.207288
Firmicutes	5187	7086	33105	5745	12780.8	43.6598		10390	7481	6175	7850	7974	54.9713		32706	23702	9527	9493	18857	39.9881
Proteobacteria	546	906	6115	935	2125.5	7.26083		709	698	460	407	568.5	3.91914		6780	14221	517	1125	5660.75	12.0042
Verrucomicrobia	28	1	69	0	24.5	0.0836934		67	348	222	236	218.25	1.50458		1	1	92	1	23.75	0.0503642
					29273.5	100						14505.8	100						47156.5	100
Phylum	Sham_M	Sham_M	Sham_M	Sham_M	Average	Percentage		CCI_M	CCI_M	CCI_M	CCI_M	Average	Percentage		CCI_F→M	CCI_F→M	CCI_F→M	CCI_F→M	Average	Percentage
Actinobacteria	1667	524	510	363	766	1.06755		1702	1408	204	414	932	1.5043		754	949	889	1285	969.25	1.6155
Bacteroidetes	33357	41431	43833	27047	36417	50.7533		14566	16649	24865	29009	21272.2	34.3346		25673	13513	20046	30641	22468.2	37.4491
Deferribacteres	310	313	510	1351	621	0.865469		69	178	117	47	102.75	0.165844		27	56	1441	333	464.25	0.773792
Firmicutes	32318	28169	31647	21826	28490	39.7057		50968	41311	20064	23547	33972.5	54.8335		31343	35216	32601	32330	32872.5	54.7905
Proteobacteria	6475	4689	5117	5455	5434	7.5732		2441	3895	4701	2416	3363.25	5.42847		1660	2804	4540	3884	3222	5.37029
Verrucomicrobia	16	9	16	59	25	0.0348417		24	86	1007	8135	2313	3.73331		2	0	0	0	0.5	0.000833378
					71753	100						61955.8	100						59996.8	100
Firmicutes/Bacteroidetes ratio
Sham_M			Sham_F			CCI_M			CCI_F			CCI_M→F			CCI_F→M
Firmicutes	Bacteroidetes	F/B ratio	Firmicutes	Bacteroidetes		Firmicutes	Bacteroidetes	F/B ratio	Firmicutes	Bacteroidetes	F/B ratio	Firmicutes	Bacteroidetes	F/B ratio	Firmicutes	Bacteroidetes	F/B ratio
32318	33357	0.968852	5187	7209	0.719517	50968	14566	3.49911	10390	6781	1.53222	32706	44284	0.738551	31343	25673	1.22085
28169	41431	0.679902	7086	7389	0.958993	41311	16649	2.48129	7481	5396	1.3864	23702	31392	0.755033	35216	13513	2.60608
31647	43833	0.72199	33105	34326	0.964429	20064	24865	0.806917	6175	4076	1.51497	9527	7084	1.34486	32601	20046	1.62631
21826	27047	0.806966	5745	6851	0.838564	23547	29009	0.811714	7850	4557	1.72262	9493	5663	1.67632	32330	30641	1.05512
		0.794427			0.870376			1.89976			1.53905			1.12869			1.62709
